# Supplementary material for: RETRACTED ARTICLE: The HOTAIRM1/miR-107/TDG axis regulates papillary thyroid cancer cell proliferation and invasion
Source: PubMed Central journal article supplement (PMC7142115; doi:10.1038/s41419-020-2416-1), 2020-04-08

# DECLARATION OF CONTRIBUTIONS TO ARTICLE

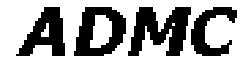

Manuscript Number:

CDDIS-19-2158RR

Journal Name:

*Cell Death & Disease*

(the 'Journal')

Proposed Title of the Contribution:

Author contributions to the manuscript (CDDIS-19-2158RR)

(the 'Contribution')

Author(s):

Dan Li, Li Chai, Xiaqing Yu, Yingchun Song, Xuchao Zhu, Suyun Fan, Wen Jiang, Tingting Qiao, Junyu Tong, Simin Liu, Lihong Fan, Zhongwei Lv

(the 'Authors')

For all *CDDis* articles, each person named as an author in the published version must be able to show he or she has contributed substantially to the article.

Authorship credit should be based on 1) substantial contributions to conception and design, acquisition of data, or analysis and interpretation of data; 2) drafting the article or revising it critically for important intellectual content; and 3) final approval of the version to be published. Authors should meet conditions 1, 2 and 3.

Any person who cannot be shown to have made a substantial contribution to the article cannot be listed as an author in the final version. The name of any person who is deemed to have made a minor contribution can, however, appear in the Acknowledgments section of the article.

Please complete the table below to indicate the contributions of all named authors to the manuscript.

| Author Full Name: | Specification of Contribution to the Manuscript:                                                    |
|-------------------|-----------------------------------------------------------------------------------------------------|
| Dan Li            | DL designed the subject, arranged the experiments, analyzed the results, and edited the manuscript. |
| Li Chai           | LC did the experiments, collected clinical samples, and edited the manuscript.                      |
| Xiaqing Yu        | XY did the experiments, wrote the manuscript, and revised the manuscript.                           |
| Yingchun Song     | YS did experiments and helped with statistical analysis.                                            |
| Xuchao Zhu        | XZ did experiments and helped with data analysis.                                                   |
| Suyun Fan         | SF collected clinical samples and helped data analysis.                                             |
| Wen Jiang         | WJ helped with the in vivo experiments.                                                             |
| Tingting Qiao     | TQ helped with the in vitro experiments.                                                            |
| Junyu Tong        | JT helped with sample collection.                                                                   |
| Simin Liu         | SL helped with statistical analysis.                                                                |
| Lihong Fan        | LF helped design the experiments and analyze the results.                                           |
| Zhongwei Lv       | ZL helped design the experiments and analyze the results.                                           |
|                   |                                                                                                     |

Please complete the table below to indicate the contributions of all named authors to the figures.

Figure 1:

In Figure 1, SF,LC,JT and SL generated the data and prepared panel A-D; YS and TQ generated data and prepared panel E; LC and ZL assembled the figure.

Figure 2:

In Figure 2, XY,TQ and DL generated the data and prepared panel A-D; XZ,WJ and DL generated data and prepared panel E-I; DL and ZL assembled the figure.

Figure 3:

In Figure 3, YS,TQ and LC generated the data and prepared panel A-C; LC and ZL assembled the figure.

Figure 4:

In Figure 4, SF, LC,JT and SL generated the data and prepared panel A-B; LC,XZ and DL generated the data and prepared panel C-D; LC, XY and YS generated the data and prepared panel E-I; LC, ZL and LF assembled the figure.

Figure 5:

In Figure 5, DL, XY and TQ generated the data and prepared panel A-C; YS and LC generated data and prepared panel D-F; DL and LF assembled the figure.

Figure 6:

In Figure 6, XY and SL generated the data and prepared panel A-B; XY, JT and TQ generated data and prepared panel C-E; XY and TQ generated data and prepared panel F-G; XZ, YS and WJ generated data and prepared panel H-L; DL and LF assembled the figure.

In Figure 7, YS, XY and DL generated the data and prepared panel A,D,E,H; XY, DL and TQ generated data and prepared panel B,C,G; XY ,WJ and SL generated data and prepared panel F,I,J; DL and ZL assembled the figure.

In Figure 8, XZ and DL generated the figure.

In Figure S1, LC and XZ generated the data and assembled the figure.

Signed for and on behalf of the Author(s):

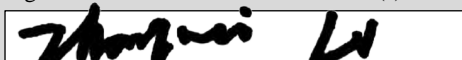

Print Name:

Zhongwei Lv, Lihong Fan

Date:

2020-3-9



Supplement: 41419_2020_2416_MOESM4_ESM.pdf [file 41419_2020_2416_MOESM4_ESM.pdf]
